# Supplementary material for: Metabolite Biomarkers for Early Ischemic–Hypoxic Encephalopathy: An Experimental Study Using the NeoBase 2 MSMS Kit in a Rat Model
Source: MDPI journal article supplement (doi:10.3390/ijms25042035), 2024-02-07
Supplement: s1 [file s1]

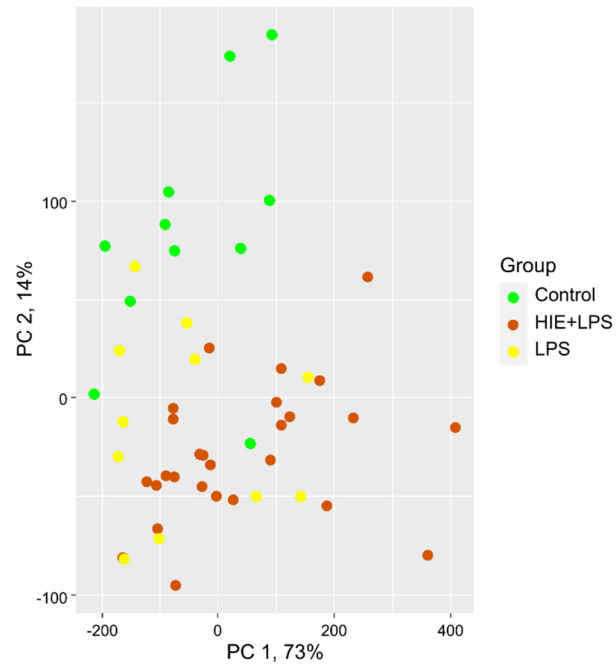

**Figure S1.** Principal component analysis (PCA) for the study of the effect inflammation influence on ischemia/hypoxia DBS metabolites, whose levels are statistically significantly different when comparing pairwise groups.

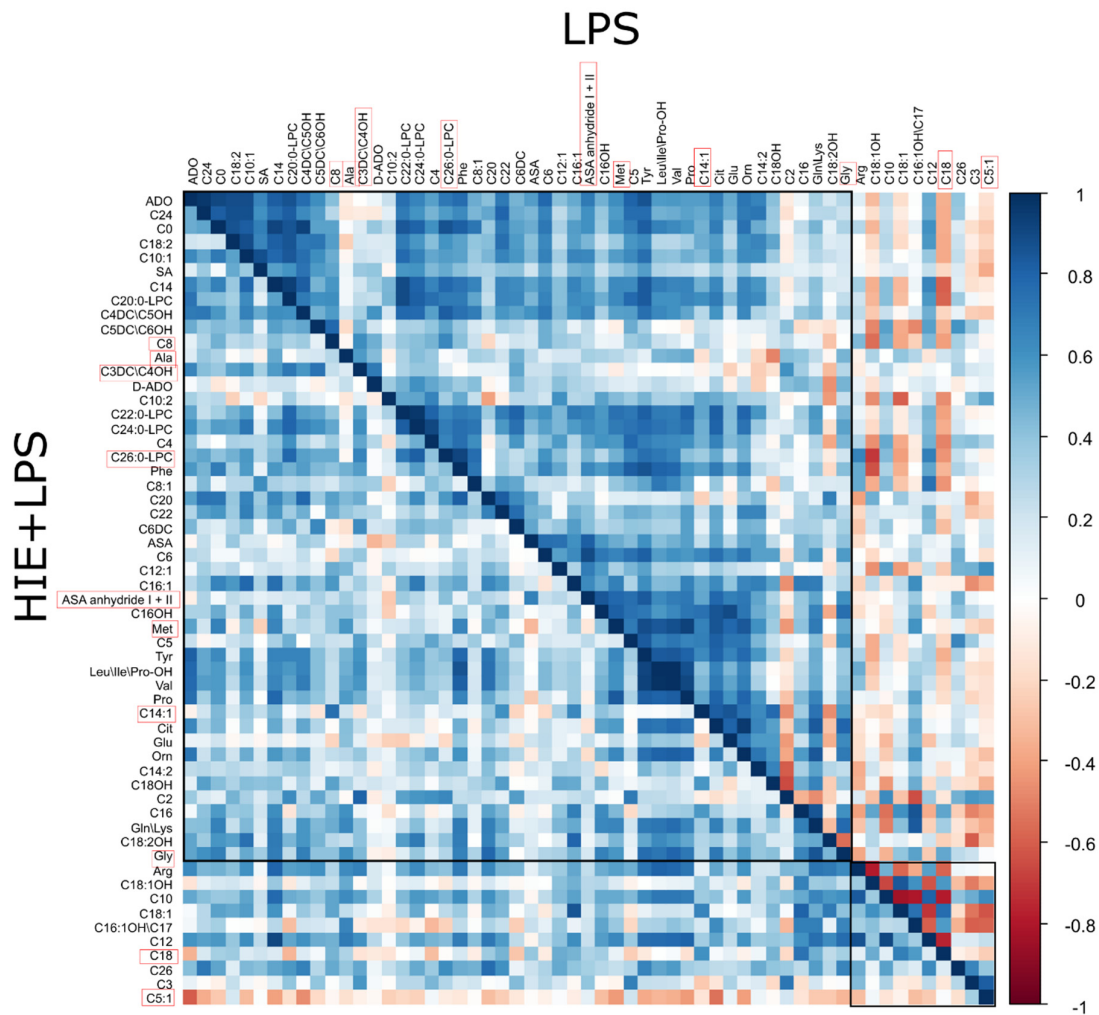

**Figure S2.** Comparison of correlations for the group with inflammation and the group with inflammation and hypoxia/ischemia. Compounds with a statistically significant difference in levels are highlighted in red, clusters of compounds are highlighted in black squares.

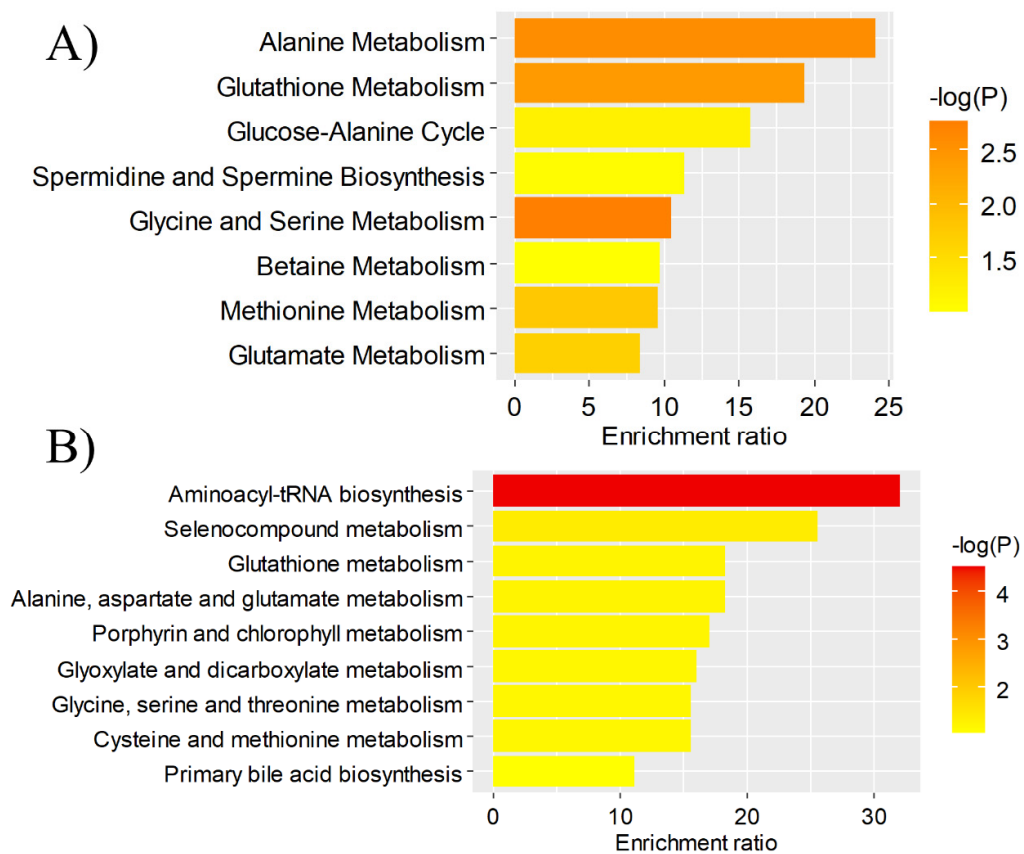

**Figure S3.** Enrichment levels of statistically significantly enriched pathways during ischemia/hypoxia against the inflammation according to **A)** the SMPDB library, **B)** the KEGG library.

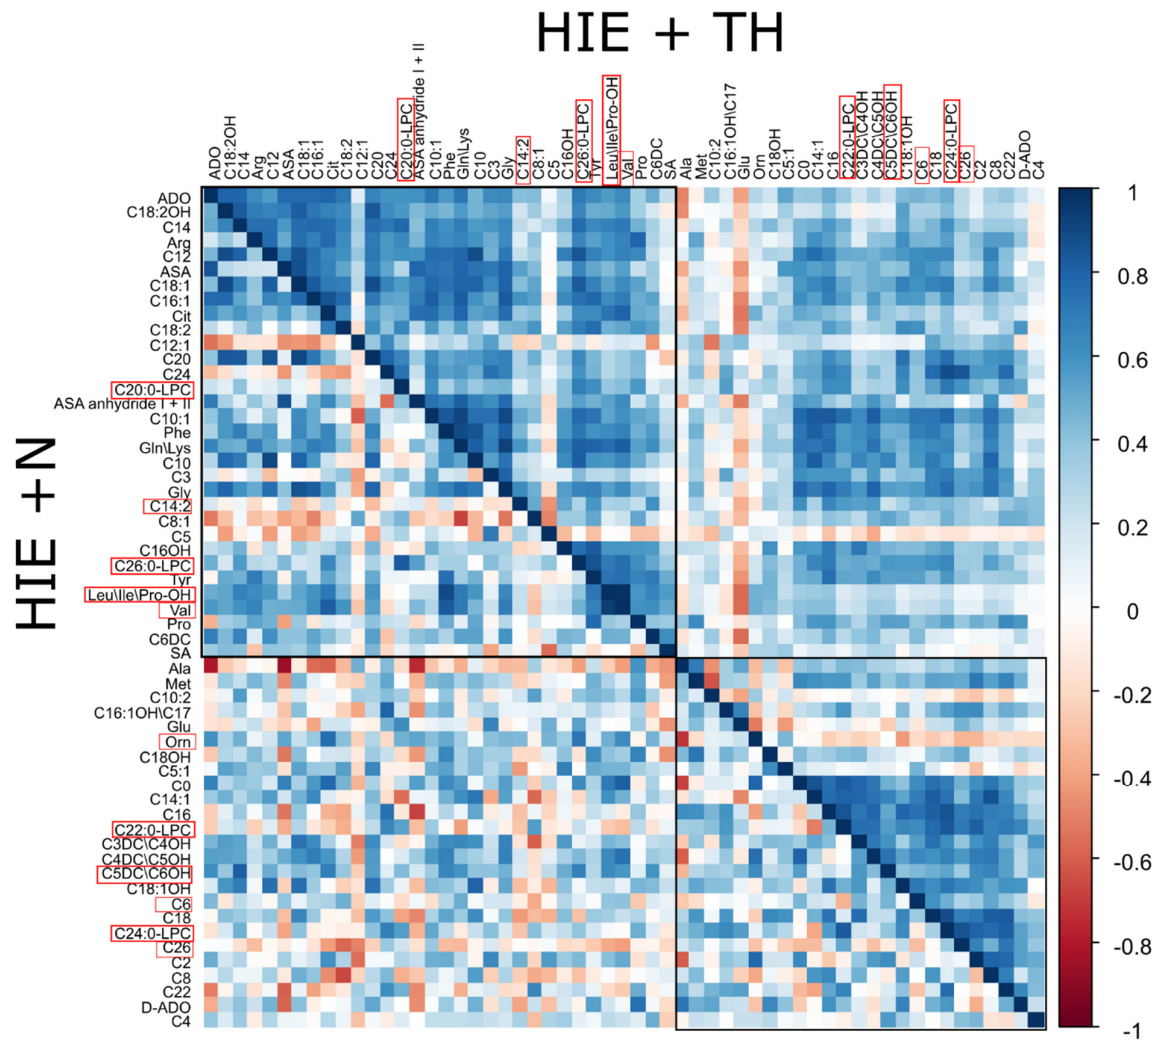

**Figure S4.** Comparison of correlations for the group with normothermia and the group with hypothermia after hypoxia/ischemia. Compounds with a statistically significant difference in levels are highlighted in red, clusters of compounds are highlighted in black squares.

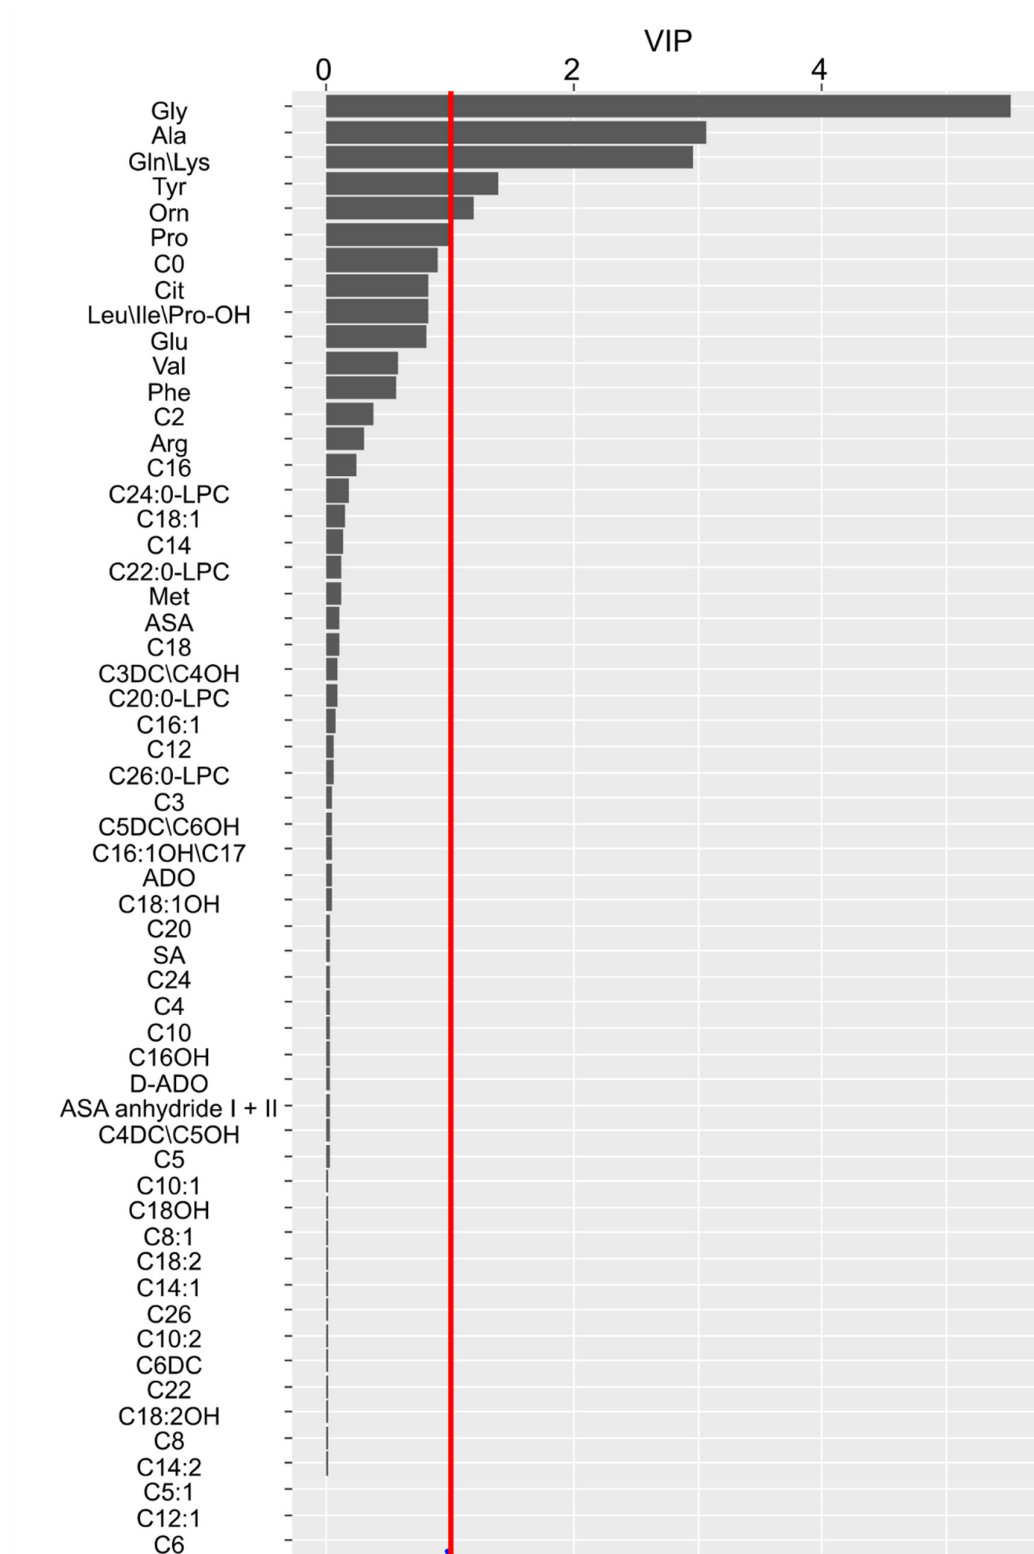

**Figure S5.** Distribution of variable projection values (VIP) in the OPLS-DA model for diagnosing hypoxia using a blood profile three hours after injury. The red line is threshold (VIP = 1) of more important metabolites.

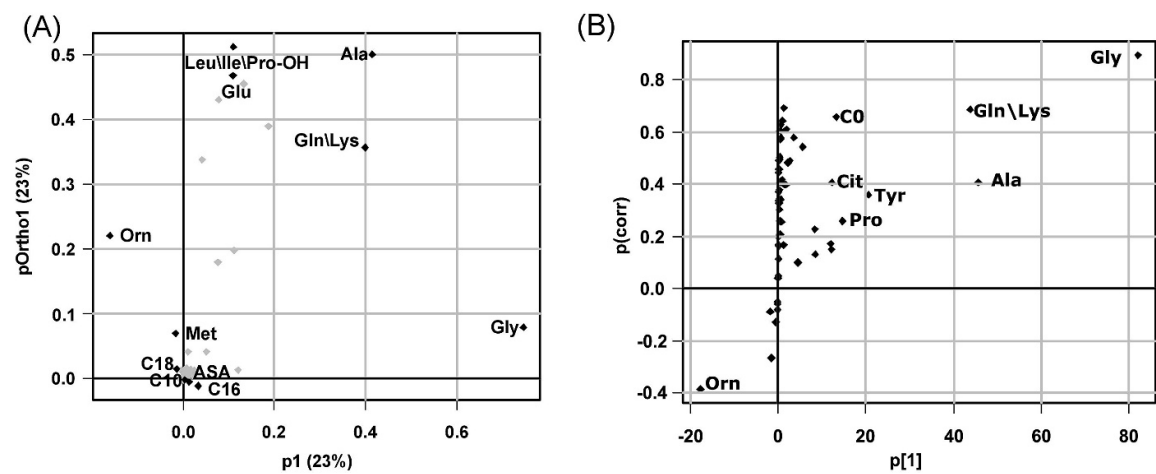

**Figure S6.** Loading plot (A) and S-plot (B) of compounds, which are included in the OPLS model for hypoxia detection 3 hours after damage.

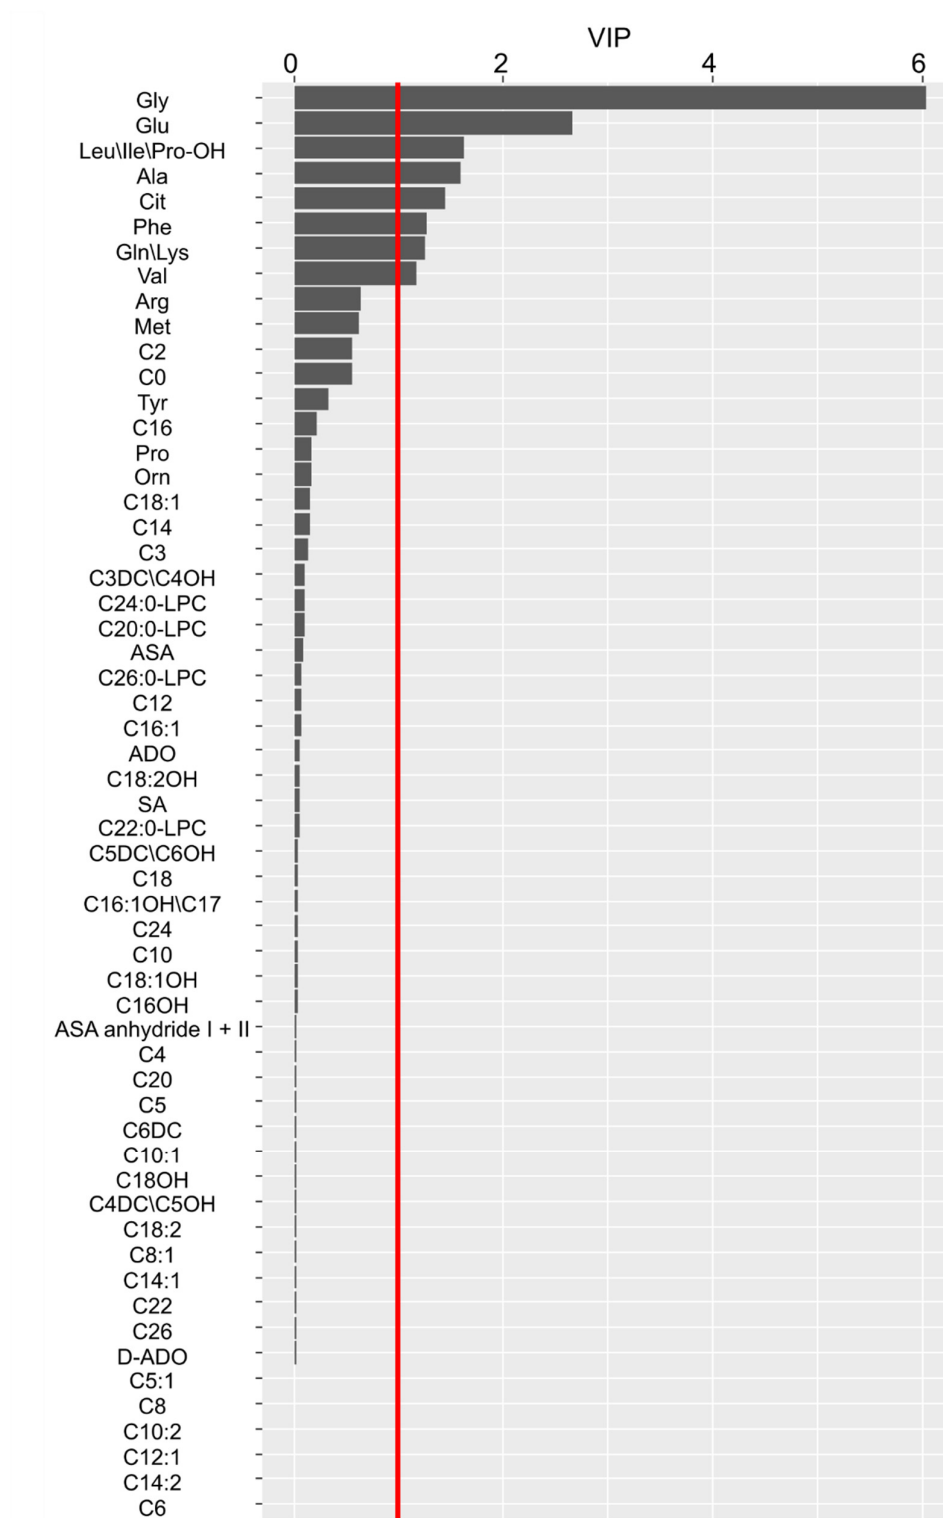

**Figure S7.** Distribution of variable projection values (VIP) in the OPLS-DA model for diagnosing hypoxia using a blood profile six hours after injury. The red line is threshold (VIP = 1) of more important metabolites.

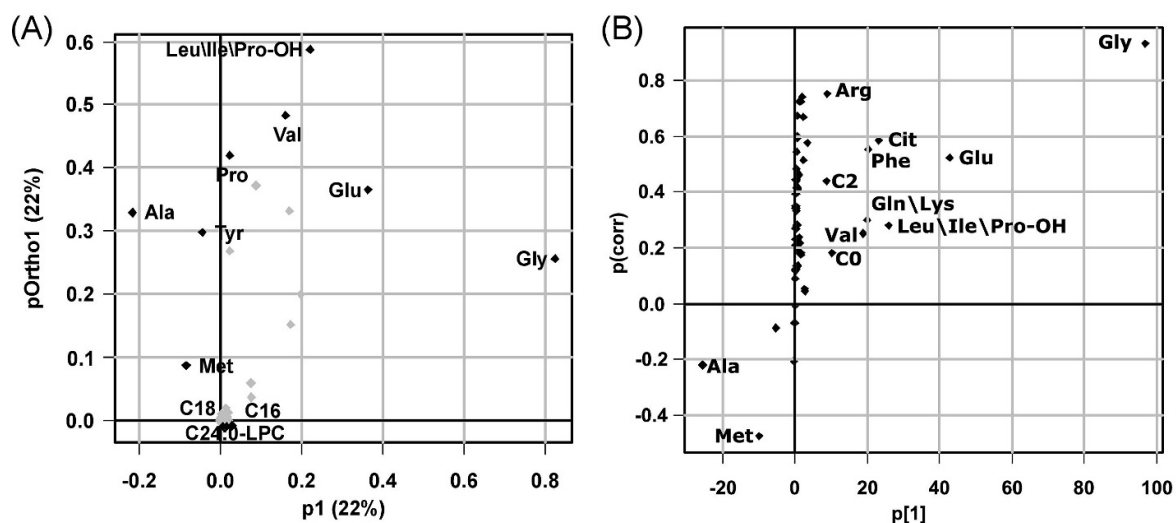

**Figure S8.** Loading plot (A) and S-plot (B) of compounds, which are included in the OPLS model for hypoxia detection 6 hours after damage.

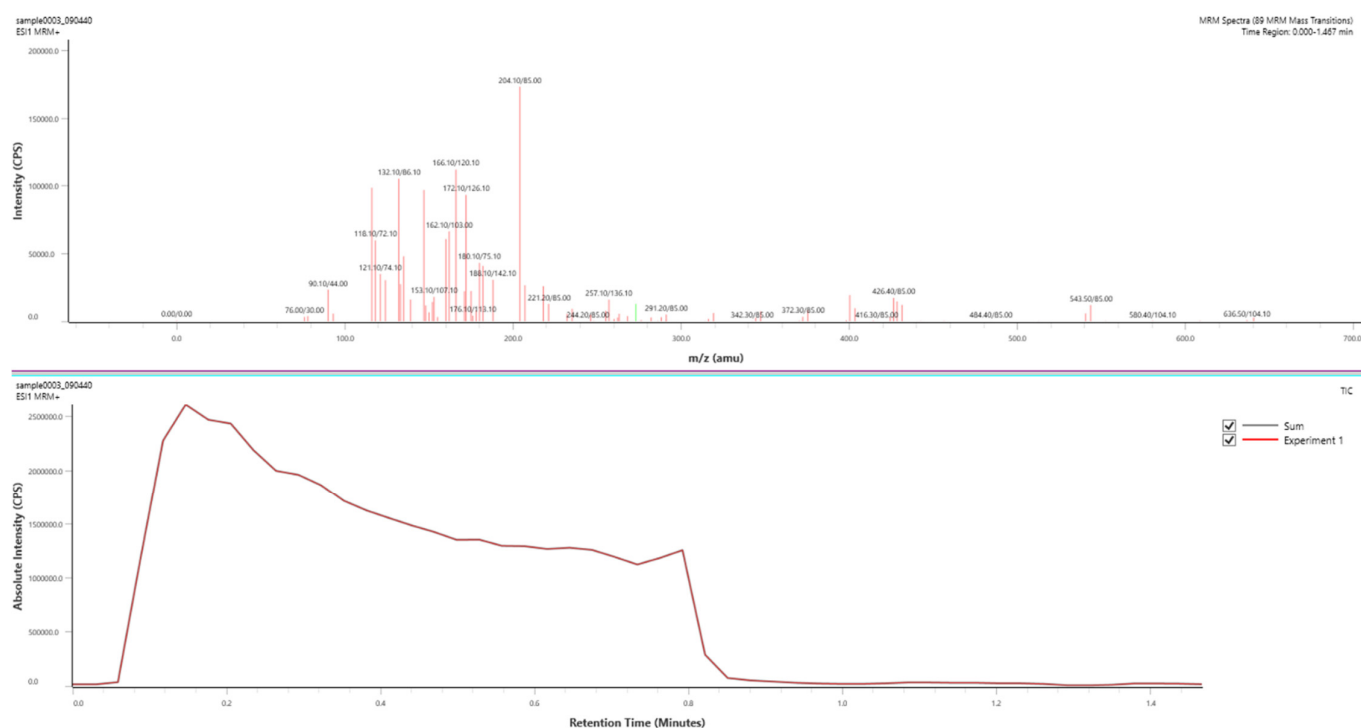

**Figure S9.** Example of a typical flow injection chromatogram obtained for a low quality control (LC) provided by NeoBase™ 2 Non-derivatized MSMS kit on the QSight 225MD tandem mass spectrometer.



**Table S1.** Differences in the molecular profile of blood 3 hours after hypoxia compared to control. Changes with FDR < 0.05 are marked bold.

| Species    | control              | 3 h                 | <i>p</i>         | FDR          | FC          |
|------------|----------------------|---------------------|------------------|--------------|-------------|
| <b>Gly</b> | <b>237(217;279)</b>  | <b>359(322;384)</b> | <b>&lt;0.001</b> | <b>0.004</b> | <b>1.51</b> |
| C3DC\C4OH  | 0.093(0.082;0.12)    | 0.15(0.12;0.16)     | 0.003            | 0.08         | 1.61        |
| C5DC\C6OH  | 0.022(0.019;0.028)   | 0.034(0.026;0.042)  | 0.02             | 0.21         | 1.55        |
| C10:2      | 0.002(0.002;0.0028)  | 0.004(0.003;0.004)  | 0.02             | 0.21         | 2.00        |
| Gln\Lys    | 149(126;188)         | 202(187;211)        | 0.02             | 0.21         | 1.36        |
| C26        | 0.004(0.004;0.005)   | 0.005(0.005;0.006)  | 0.02             | 0.21         | 1.25        |
| C2         | 3.9(3.2;4.5)         | 4.3(4.1;5.6)        | 0.03             | 0.21         | 1.10        |
| C18:2      | 0.005(0.0042;0.0068) | 0.009(0.006;0.01)   | 0.03             | 0.21         | 1.80        |
| C14        | 0.32(0.28;0.36)      | 0.42(0.35;0.44)     | 0.04             | 0.27         | 1.31        |
| C24        | 0.034(0.03;0.035)    | 0.039(0.035;0.045)  | 0.05             | 0.27         | 1.15        |

**Table S2.** Differences in the molecular profile of blood 6 hours after hypoxia compared to control. Changes with FDR < 0.05 are marked bold.

| Species          | Control                     | 6 h                         | <i>p</i>         | FDR          | FC          |
|------------------|-----------------------------|-----------------------------|------------------|--------------|-------------|
| <b>Gly</b>       | <b>237(217;279)</b>         | <b>376(327;448)</b>         | <b>&lt;0.001</b> | <b>0.002</b> | <b>1.59</b> |
| <b>C26</b>       | <b>0.004(0.004;0.005)</b>   | <b>0.0075(0.0058;0.009)</b> | <b>&lt;0.001</b> | <b>0.009</b> | <b>1.88</b> |
| <b>Met</b>       | <b>20(18;22)</b>            | <b>15(13;17)</b>            | <b>0.002</b>     | <b>0.03</b>  | <b>0.75</b> |
| <b>C3DC\C4OH</b> | <b>0.093(0.082;0.12)</b>    | <b>0.16(0.12;0.18)</b>      | <b>0.002</b>     | <b>0.03</b>  | <b>1.72</b> |
| <b>C3</b>        | <b>0.15(0.13;0.16)</b>      | <b>0.22(0.18;0.28)</b>      | <b>0.002</b>     | <b>0.03</b>  | <b>1.47</b> |
| <b>C4</b>        | <b>0.042(0.04;0.048)</b>    | <b>0.053(0.05;0.061)</b>    | <b>0.004</b>     | <b>0.04</b>  | <b>1.26</b> |
| <b>C18:2</b>     | <b>0.005(0.0042;0.0068)</b> | <b>0.008(0.007;0.009)</b>   | <b>0.006</b>     | <b>0.05</b>  | <b>1.60</b> |
| C2               | 3.9(3.2;4.5)                | 5(4.6;5.8)                  | 0.009            | 0.06         | 1.28        |
| C5DC\C6OH        | 0.022(0.019;0.028)          | 0.031(0.029;0.038)          | 0.01             | 0.07         | 1.41        |
| C24              | 0.034(0.03;0.035)           | 0.040(0.037;0.046)          | 0.01             | 0.07         | 1.18        |
| C8:1             | 0.0075(0.0055;0.008)        | 0.012(0.0097;0.015)         | 0.01             | 0.07         | 1.60        |
| C20              | 0.024(0.022;0.03)           | 0.032(0.029;0.039)          | 0.02             | 0.08         | 1.33        |
| C5               | 0.03(0.025;0.037)           | 0.039(0.036;0.045)          | 0.02             | 0.11         | 1.30        |
| SA               | 0.33(0.32;0.36)             | 0.37(0.35;0.38)             | 0.03             | 0.11         | 1.12        |
| C10:2            | 0.002(0.002;0.0028)         | 0.0035(0.0028;0.0052)       | 0.03             | 0.13         | 1.75        |

**Table S3.** Pathways enriched with markers for a three-hour time period after ischemia/hypoxia relative to the control using the SMPDB and KEGG libraries, the number of compounds in them, the degree of enrichment, the number of markers in them, the probability of a random hit.

| Library | Pathway                                       | Total | Enrichment, Mean | Hits, Median | <i>p</i> , Mean |
|---------|-----------------------------------------------|-------|------------------|--------------|-----------------|
| SMPDB   | Ammonia Recycling                             | 32    | 15.99            | 2            | 0.03            |
| SMPDB   | Beta Oxidation of Very Long Chain Fatty Acids | 17    | 18.41            | 1            | 0.05            |
| SMPDB   | Alanine Metabolism                            | 17    | 18.41            | 1            | 0.05            |
| SMPDB   | Carnitine Synthesis                           | 22    | 23.26            | 2            | 0.02            |
| KEGG    | Glyoxylate and dicarboxylate metabolism       | 32    | 34.65            | 2            | 0.01            |
| KEGG    | Aminoacyl-tRNA biosynthesis                   | 48    | 31.99            | 2            | 0.001           |
| KEGG    | Glutathione metabolism                        | 28    | 24.36            | 1            | 0.04            |
| KEGG    | Porphyrin and chlorophyll metabolism          | 30    | 22.74            | 1            | 0.04            |
| KEGG    | Glycine, serine and threonine metabolism      | 33    | 20.67            | 1            | 0.049           |

**Table S4.** Pathways enriched with markers for a six-hour time period after ischemia/hypoxia relative to the control using the SMPDB and KEGG libraries, the number of compounds in them, the degree of enrichment, the number of markers in them, the probability of a random hit.

| Library | Pathway                                  | Total | Enrichment, Mean | Hits, Median | <i>p</i> , Mean |
|---------|------------------------------------------|-------|------------------|--------------|-----------------|
| SMPDB   | Oxidation of Branched Chain Fatty Acids  | 26    | 19.61            | 2            | 0.004           |
| SMPDB   | Methionine Metabolism                    | 43    | 11.90            | 2            | 0.01            |
| SMPDB   | Glycine and Serine Metabolism            | 59    | 8.70             | 2            | 0.02            |
| KEGG    | Aminoacyl-tRNA biosynthesis              | 48    | 32.00            | 2            | <0.001          |
| KEGG    | Glutathione metabolism                   | 28    | 27.40            | 1            | 0.04            |
| KEGG    | Porphyrin and chlorophyll metabolism     | 30    | 25.58            | 1            | 0.04            |
| KEGG    | Glyoxylate and dicarboxylate metabolism  | 32    | 23.98            | 1            | 0.04            |
| KEGG    | Glycine, serine and threonine metabolism | 33    | 23.26            | 1            | 0.04            |
| KEGG    | Cysteine and methionine metabolism       | 33    | 23.26            | 1            | 0.04            |

Table S5. Differences in the molecular profile of blood after hypothermic regimen compared to normothermic regimen in a rat model of hypoxic-ischemic injury.

| Compounds      | Normotermia          | Hypotermia          | <i>p</i> | FDR  | FC   |
|----------------|----------------------|---------------------|----------|------|------|
| C22:0-LPC      | 1.5(1.3;1.7)         | 1.2(1.1;1.4)        | 0.006    | 0.20 | 0.80 |
| C24:0-LPC      | 2.3(2.1;2.7)         | 1.9(1.8;2.2)        | 0.007    | 0.20 | 0.83 |
| Orn            | 17(13;21)            | 25(20;41)           | 0.01     | 0.23 | 1.47 |
| C26            | 0.007(0.0062;0.008)  | 0.006(0.005;0.007)  | 0.02     | 0.25 | 0.86 |
| Val            | 110(104;124)         | 146(120;171)        | 0.02     | 0.25 | 1.33 |
| C20:0-LPC      | 2.8(1.9;3.2)         | 2.1(1.7;2.5)        | 0.03     | 0.25 | 0.75 |
| C26:0-LPC      | 0.49(0.42;0.52)      | 0.39(0.36;0.44)     | 0.04     | 0.25 | 0.80 |
| C5DC\C6OH      | 0.043(0.034;0.048)   | 0.029(0.027;0.041)  | 0.04     | 0.25 | 0.67 |
| Leu\Ile\Pro-OH | 160(154;188)         | 209(177;229)        | 0.04     | 0.25 | 1.31 |
| C6             | 0.004(0.003;0.005)   | 0.003(0.002;0.0032) | 0.04     | 0.25 | 0.75 |
| C14:2          | 0.007(0.0062;0.0087) | 0.006(0.005;0.007)  | 0.05     | 0.25 | 0.86 |

**Table S6.** Parameters of the logistic regression model for the diagnosis of ischemia/hypoxia after 3 hours. Coefficient  $\beta$ , confidence interval CI  $\beta$ , Wald criteria Z, coefficient zero-probability P are provided.

| Variable  | $\beta$               | CI $\beta$                                    | Z     | <i>p</i> |
|-----------|-----------------------|-----------------------------------------------|-------|----------|
| Intercept | -6.64                 | -14.06 - -2.52                                | -2.43 | 0.02     |
| Glycine^2 | 7.37*10 <sup>-5</sup> | 3.01*10 <sup>-5</sup> - 1.56*10 <sup>-4</sup> | 2.49  | 0.01     |

**Table S7.** Parameters of the logistic regression model for the diagnosis of ischemia/hypoxia after 6 hours. Coefficient  $\beta$ , confidence interval CI  $\beta$ , Wald criteria Z, coefficient zero-probability P are provided

| Variable  | $\beta$               | CI $\beta$                                    | Z     | <i>p</i> |
|-----------|-----------------------|-----------------------------------------------|-------|----------|
| Intercept | -9.13                 | -23.50 - -3.14                                | -1.96 | 0.05     |
| Glycine^2 | 9.54*10 <sup>-5</sup> | 3.36*10 <sup>-5</sup> - 2.43*10 <sup>-4</sup> | 1.98  | 0.048    |

**Table S8.** MS parameters used for FIA-MS/MS analysis by NeoBase™ 2 Non-derivatized MSMS kit. For each compound, MRM transition (Q1 and Q3), entrance voltage, collision cell lens 2, collision energy, and dwell time are shown. IS - internal standard.

| Compound             | Q1    | Q3    | Entrance Voltage | Dwell Time | Collision Cell Lens 2 | Collision Energy |
|----------------------|-------|-------|------------------|------------|-----------------------|------------------|
| Gly                  | 76    | 30    | 30               | 15         | -100                  | -50              |
| Gly IS               | 78    | 32    | 30               | 15         | -100                  | -50              |
| Ala                  | 90,1  | 44    | 30               | 15         | -100                  | -50              |
| Ala IS               | 93,1  | 47,1  | 30               | 15         | -100                  | -50              |
| Pro                  | 116,1 | 70,1  | 30               | 15         | -100                  | -50              |
| Pro IS               | 121,1 | 74,1  | 30               | 15         | -100                  | -50              |
| Val                  | 118,1 | 72,1  | 30               | 15         | -100                  | -50              |
| Val IS               | 124,1 | 77,1  | 30               | 15         | -100                  | -50              |
| Leu\Ile\Pro-OH       | 132,1 | 86,1  | 30               | 15         | -100                  | -50              |
| Leu\Ile\Pro-OH IS    | 135,1 | 89,1  | 30               | 15         | -100                  | -50              |
| Orn                  | 133,1 | 70,1  | 30               | 15         | -100                  | -50              |
| Orn IS               | 139,1 | 76,1  | 30               | 15         | -100                  | -50              |
| Gln\Lys              | 147,1 | 84    | 30               | 15         | -100                  | -50              |
| Glu                  | 148,1 | 84    | 30               | 15         | -100                  | -50              |
| Gln\Lys IS           | 152,1 | 88,1  | 30               | 15         | -100                  | -50              |
| Met                  | 150,1 | 104,1 | 30               | 15         | -100                  | -50              |
| Met IS               | 153,1 | 107,1 | 30               | 15         | -100                  | -50              |
| SA                   | 155,1 | 109,1 | 30               | 15         | -100                  | -50              |
| SA IS                | 160,1 | 114,1 | 30               | 15         | -100                  | -50              |
| Phe                  | 166,1 | 120,1 | 30               | 15         | -100                  | -50              |
| Phe IS               | 172,1 | 126,1 | 30               | 15         | -100                  | -50              |
| Arg                  | 175,1 | 70,1  | 30               | 15         | -100                  | -50              |
| Arg IS               | 180,1 | 75,1  | 30               | 15         | -100                  | -50              |
| Cit                  | 176,1 | 113,1 | 30               | 15         | -100                  | -50              |
| Cit IS               | 178,1 | 115,1 | 30               | 15         | -100                  | -50              |
| Tyr                  | 182,1 | 136,1 | 30               | 15         | -100                  | -50              |
| Tyr IS               | 188,1 | 142,1 | 30               | 15         | -100                  | -50              |
| D-ADO                | 252,1 | 136,1 | 30               | 15         | -100                  | -50              |
| D-ADO IS             | 257,1 | 136,1 | 30               | 15         | -100                  | -50              |
| ADO                  | 268,1 | 136,1 | 30               | 15         | -100                  | -50              |
| ADO IS               | 273,1 | 136,1 | 30               | 15         | -100                  | -50              |
| ASA anhydride I + II | 273,1 | 70,1  | 30               | 15         | -100                  | -50              |
| ASA                  | 291,1 | 70,1  | 30               | 15         | -100                  | -50              |
| C0                   | 162,1 | 103   | 30               | 15         | -100                  | -50              |
| C0 IS                | 171,2 | 103   | 30               | 15         | -100                  | -50              |
| C2                   | 204,1 | 85    | 30               | 15         | -100                  | -50              |
| C2 IS                | 207,1 | 85    | 30               | 15         | -100                  | -50              |
| C3                   | 218,1 | 85    | 30               | 15         | -100                  | -50              |
| C3 IS                | 221,2 | 85    | 30               | 15         | -100                  | -50              |
| C3DC\C4OH            | 248,1 | 85    | 30               | 15         | -100                  | -50              |
| C4                   | 232,2 | 85    | 30               | 15         | -100                  | -50              |
| C4 IS                | 235,2 | 85    | 30               | 15         | -100                  | -50              |

|              |       |       |    |    |      |     |
|--------------|-------|-------|----|----|------|-----|
| C5:1         | 244,2 | 85    | 30 | 15 | -100 | -50 |
| C5           | 246,2 | 85    | 30 | 15 | -100 | -50 |
| C4DC\C5OH    | 262,2 | 85    | 30 | 15 | -100 | -50 |
| C5 IS        | 255,2 | 85    | 30 | 15 | -100 | -50 |
| C6           | 260,2 | 85    | 30 | 15 | -100 | -50 |
| C6 IS        | 263,2 | 85    | 30 | 15 | -100 | -50 |
| C5DC\C6OH    | 276,2 | 85    | 30 | 15 | -100 | -50 |
| C6DC         | 290,2 | 85    | 30 | 15 | -100 | -50 |
| C5DC\C6OH IS | 282,2 | 85    | 30 | 15 | -100 | -50 |
| C8:1         | 286,2 | 85    | 30 | 15 | -100 | -50 |
| C8           | 288,2 | 85    | 30 | 15 | -100 | -50 |
| C8 IS        | 291,2 | 85    | 30 | 15 | -100 | -50 |
| C10:2        | 312,2 | 85    | 30 | 15 | -100 | -50 |
| C10:1        | 314,2 | 85    | 30 | 15 | -100 | -50 |
| C10          | 316,2 | 85    | 30 | 15 | -100 | -50 |
| C10 IS       | 319,3 | 85    | 30 | 15 | -100 | -50 |
| C12:1        | 342,3 | 85    | 30 | 15 | -100 | -50 |
| C12          | 344,3 | 85    | 30 | 15 | -100 | -50 |
| C12 IS       | 347,3 | 85    | 30 | 15 | -100 | -50 |
| C14:2        | 368,3 | 85    | 30 | 15 | -100 | -50 |
| C14:1        | 370,3 | 85    | 30 | 15 | -100 | -50 |
| C14          | 372,3 | 85    | 30 | 15 | -100 | -50 |
| C14OH        | 388,3 | 85    | 30 | 15 | -100 | -50 |
| C14 IS       | 375,3 | 85    | 30 | 15 | -100 | -50 |
| C16:1        | 398,3 | 85    | 30 | 15 | -100 | -50 |
| C16          | 400,3 | 85    | 30 | 15 | -100 | -50 |
| C16:1OH\C17  | 414,3 | 85    | 30 | 15 | -100 | -50 |
| C16OH        | 416,3 | 85    | 30 | 15 | -100 | -50 |
| C16 IS       | 403,4 | 85    | 30 | 15 | -100 | -50 |
| C18:2        | 424,3 | 85    | 30 | 15 | -100 | -50 |
| C18:1        | 426,4 | 85    | 30 | 15 | -100 | -50 |
| C18          | 428,4 | 85    | 30 | 15 | -100 | -50 |
| C18:2OH      | 440,3 | 85    | 30 | 15 | -100 | -50 |
| C18:1OH      | 442,4 | 85    | 30 | 15 | -100 | -50 |
| C18OH        | 444,4 | 85    | 30 | 15 | -100 | -50 |
| C18 IS       | 431,4 | 85    | 30 | 15 | -100 | -50 |
| C20          | 456,4 | 85    | 30 | 15 | -100 | -50 |
| C22          | 484,4 | 85    | 30 | 15 | -100 | -50 |
| C24          | 512,5 | 85    | 30 | 15 | -100 | -50 |
| C26          | 540,5 | 85    | 30 | 15 | -100 | -50 |
| C26 IS       | 543,5 | 85    | 30 | 15 | -100 | -50 |
| C20:0-LPC    | 552,4 | 104,1 | 30 | 15 | -100 | -50 |
| C22:0-LPC    | 580,4 | 104,1 | 30 | 15 | -100 | -50 |
| C24:0-LPC    | 608,5 | 104,1 | 30 | 15 | -100 | -50 |
| C26:0-LPC    | 636,5 | 104,1 | 30 | 15 | -100 | -50 |
| C26:0-LPC IS | 640,5 | 104,1 | 30 | 15 | -100 | -50 |

**Table S9.** Results of mass-spectrometry analysis, include information about MRM transition, retention time, preprocessing parametr, peak height and area, concentration in fmol/mkl, for serum metabolites and internal standards in study sample, quality control sample, low concentration sample and hight concentration sample. Containing in individual excel file.
